# Supplementary material for: S4-5 乳腺充実腺管癌の遺伝子プロファイル(intrinsic subtype)と細胞診(乳癌の最前線-Up-to-date Topics-,細胞学・基礎と臨床の架け橋,第49回日本臨床細胞学会総会(春期大会))
Source: Royal Society of Chemistry journal article supplement (doi:10.1039/d0tb02265a), 2008-03-22
Supplement: d0tb02265a1.pdf [file d0tb02265a1.pdf]

## Elemental Supplementary Information

### Visualization of platelet recruitment to tumor lesions using highly sensitive and stable radioiodine studded gold nanoprobe

Sang Bong Lee,<sup>‡a</sup> Hyun Dong Ji,<sup>‡b</sup> In-Kyu Lee,<sup>c</sup> Kil Soo Kim,<sup>d,f</sup> Jaetae Lee,<sup>b,e</sup> Sang-Woo Lee,<sup>\*,b,e</sup> Yong Hyun Jeon<sup>\*,d,e</sup>

<sup>a</sup> Korea Institute of Medical Microrobotics (KIMIRo), Gwangju, 61011, South Korea.

<sup>b</sup> Department of Nuclear Medicine, Kyungpook National University Hospital, Daegu, South Korea. E-mail: swleenm@knu.ac.kr

<sup>c</sup> Department of Internal Medicine, School of Medicine, Kyungpook National University, Daegu, South Korea.

<sup>d</sup> Laboratory Animal Center, Daegu-Gyeongbuk Medical Innovation Foundation, Daegu, South Korea. E-mail: jeon9014@gmail.com

<sup>e</sup> Leading-edge Research Center for Drug Discovery and Development for Diabetes and Metabolic Disease, Kyungpook National University Hospital, Daegu, South Korea.

<sup>f</sup> College of Veterinary Medicine, Kyungpook National University, Daegu 41566, South Korea.

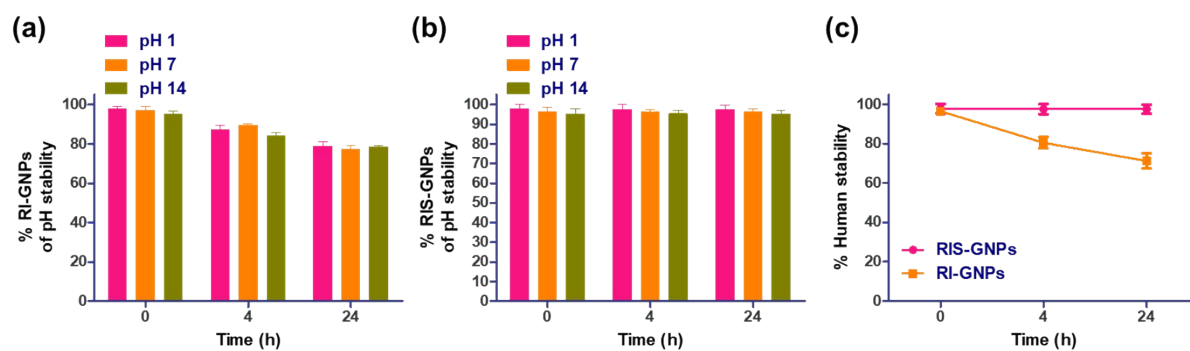

**Fig. S1.** Time-dependent stability of **(a)** RI-GNPs and **(b)** RIS-GNPs in solutions with varying pH and **(c)** in human serum.

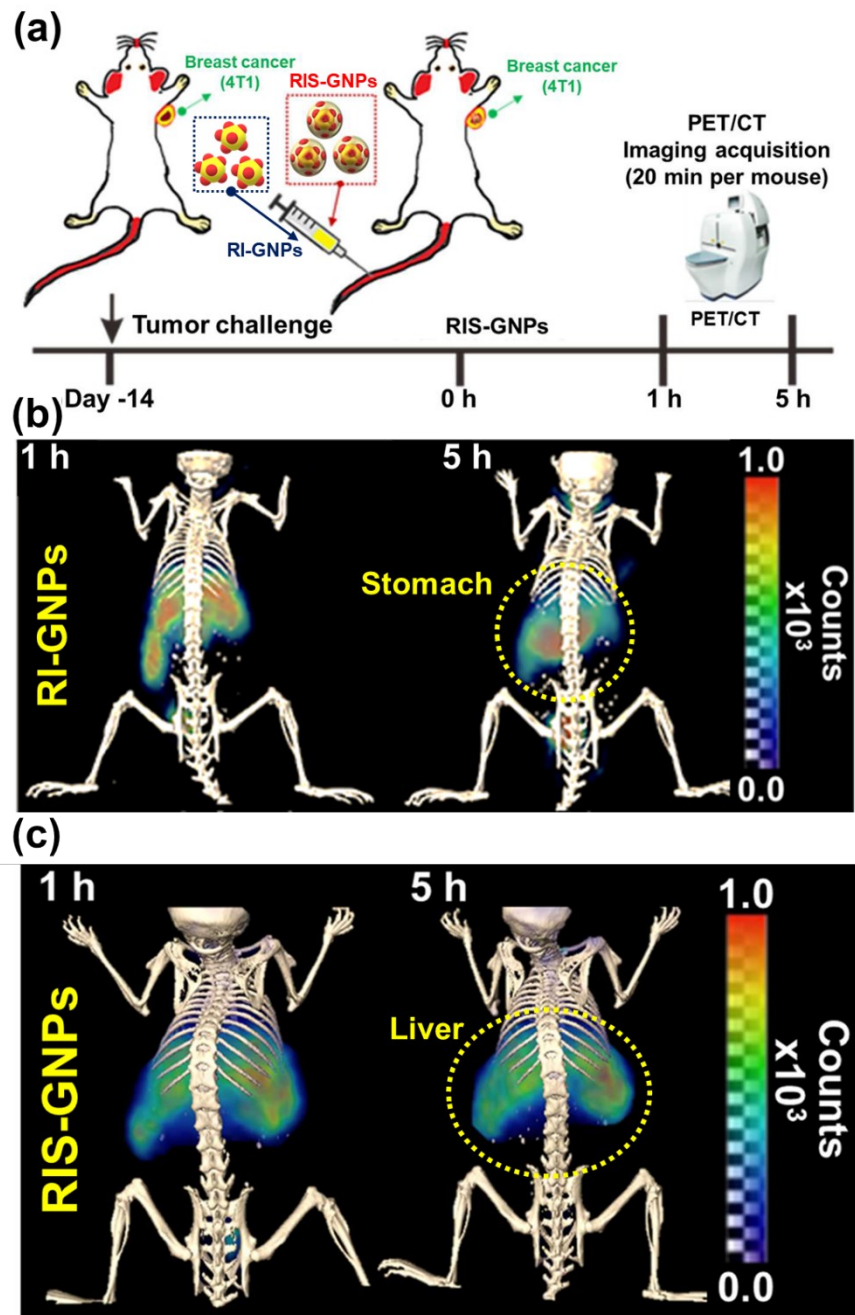

**Fig. S2.** PET/CT images of breast cancer with RI-GNPs and RIS-GNPs. **(a)** Schematic protocol for in vivo experiments. 3D-reconstructed PET/CT images revealing the distribution of **(b)** RI-GNPs and **(c)** RIS-GNPs in 4T1 tumor-bearing mice over time. Using VIVID, PET signals were analyzed with CT-based segmentation and the radioactive signal in the tumor lesion was overlaid with CT imaging.
